# Supplementary material for: Was the Giant Short-Faced Bear a Hyper-Scavenger? A New Approach to the Dietary Study of Ursids Using Dental Microwear Textures
Source: PLOS journal article supplement (doi:10.1371/journal.pone.0077531), 2013-10-30

**Figure S2. Raw data for *Asfc*, *epLsar*, and *Tfv* for lower second molars of ursids.**  
Black data points indicate mean value for each species.

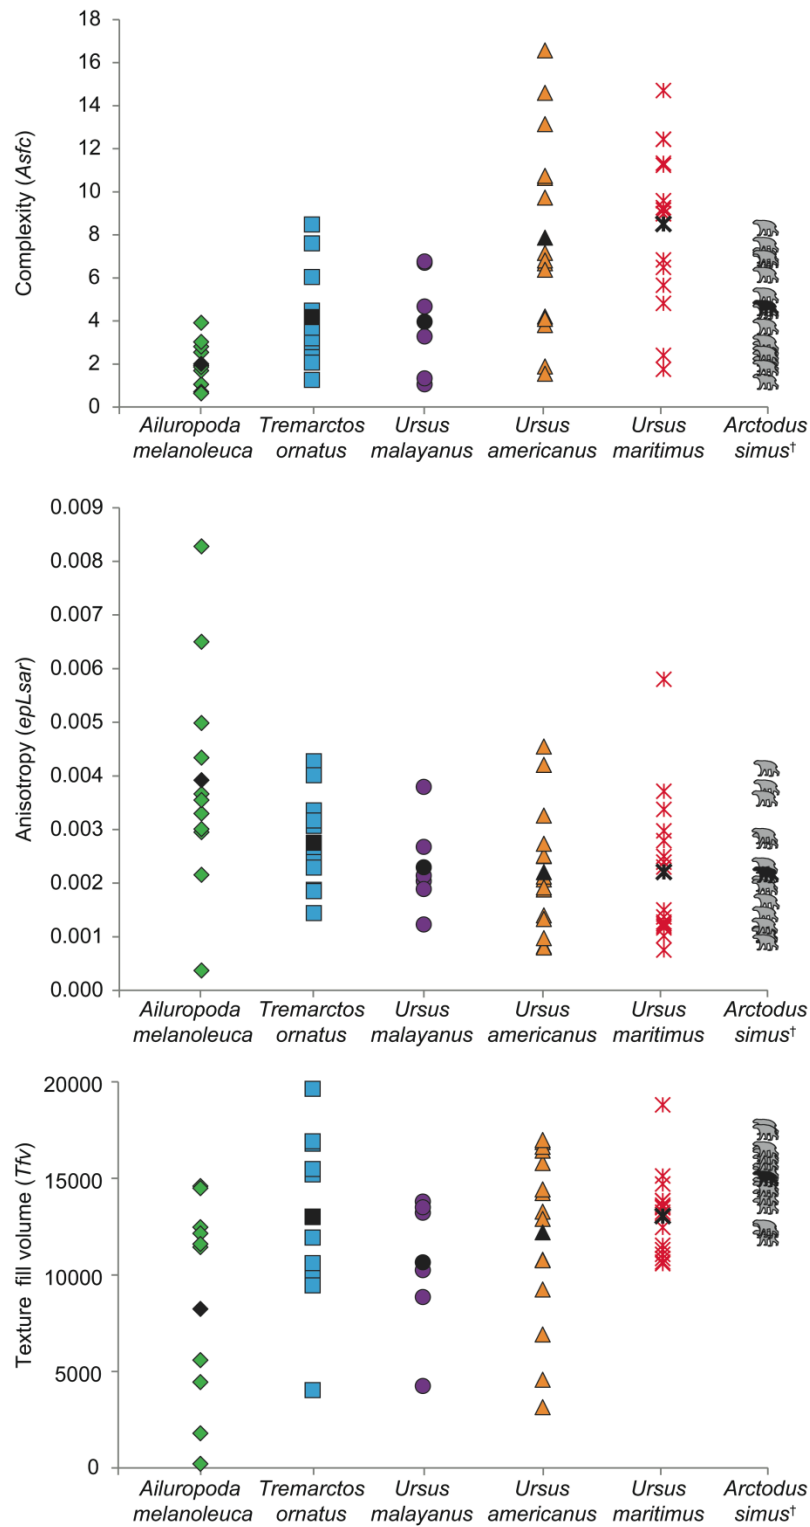

Supplement: S2 (10.1371/journal.pone.0077531.s002) [file journal.pone.0077531.s002]
